# Supplementary material
Source: PubMed Central journal article supplement (PMC7963658)
Supplement: 16-00630.pdf [file 16-00630.pdf]

**On-line Table: Anatomic characterization, procedural, and clinical outcome data**

| Patient | Baseline NIHSS | Intracranial Occlusion | IV tPA/IA tPA or Thrombectomy                   | TICI Reperfusion | Anatomic Extent ICA Dissection | Dissection Length (cm) | Flow Limitation <sup>a</sup> Classification <sup>a</sup> | Types/No. of Stents                                                                                                                                                                                    | Complications | Discharge NIHSS | 90-Day mRS |
|---------|----------------|------------------------|-------------------------------------------------|------------------|--------------------------------|------------------------|----------------------------------------------------------|--------------------------------------------------------------------------------------------------------------------------------------------------------------------------------------------------------|---------------|-----------------|------------|
| 1       | 16             | No                     | No/Yes, Thromboaspiration, Extracranial Carotid | 3                | Petrous Segment                | 8                      | 4                                                        | Precise<br>8 × 40 mm<br>7 × 40 mm<br>6 × 30 mm<br>Express SD<br>6 × 14 mm<br>6 × 14 mm<br>6 × 18 mm<br>Express Renal SD<br>6 × 14 mm<br>6 × 14 mm<br>Xience<br>4.0 × 18 mm<br>SE (n = 3)<br>BE (n = 6) | None          | 4               | 1          |
| 2       | 18             | No                     | No/No                                           | 3                | Distal Cervical Segment        | 5.5                    | 4                                                        | Wingspan<br>4.5 × 20 mm<br>Xience<br>4.0 × 28 mm<br>4.0 × 15 mm<br>4.0 × 23 mm<br>4.0 × 15 mm<br>4.0 × 18 mm<br>4.0 × 18 mm<br>SE (n = 1)<br>BE (n = 6)                                                | None          | 12              | 3          |
| 3       | 10             | No                     | No/No                                           | 3                | Cavernous Segment              | 6                      | 2b                                                       | Wingspan<br>4.5 × 15 mm<br>4.5 × 20 mm<br>4.0 × 20 mm<br>Precise<br>6 × 40 mm<br>SE (n = 4)                                                                                                            | None          | 4               | 1          |
| 4       | 4              | No                     | No/No                                           | 3                | Distal Cervical Segment        | 4                      | 3b                                                       | Wingspan<br>4.5 × 15 mm<br>4.5 × 15 mm<br>Precise<br>5 × 20 mm<br>SE (n = 3)                                                                                                                           | None          | 1               | 0          |

Continued on next page

**On-line Table: Continued**

| Patient | Baseline NIHSS | Intracranial Occlusion        | IV tPA/IA tPA or Thrombectomy  | TICI Reperfusion | Anatomic Extent ICA Dissection | Dissection Length (cm) | Flow Limitation Classification <sup>a</sup> | Types/No. of Stents                                                                                                              | Complications                                                                                             | Discharge NIHSS | 90-Day mRS |
|---------|----------------|-------------------------------|--------------------------------|------------------|--------------------------------|------------------------|---------------------------------------------|----------------------------------------------------------------------------------------------------------------------------------|-----------------------------------------------------------------------------------------------------------|-----------------|------------|
| 5       | 20             | Yes, Large vessel (M2)        | No/Yes, IA tPA Stent Retriever | 2b               | Cavernous Segment              | 7                      | 2b                                          | Wingspan<br>4.5 × 20 mm<br>4.5 × 15 mm<br>4.0 × 20 mm<br>Xience<br>4 × 38 mm<br>Precise<br>5 × 30 mm<br>SE (n = 4)<br>BE (n = 1) | None                                                                                                      | 14              | 4          |
| 6       | 5              | Yes, Small Vessel (M3-4)      | No/Yes, IA tPA                 | 2b               | Distal Cervical Segment        | 6                      | 2b                                          | Wingspan<br>4.0 × 20 mm<br>4.5 × 20 mm<br>4.5 × 15 mm<br>Precise<br>5 × 40 mm<br>Xact<br>10-8 × 40 mm<br>SE (n = 5)              | Multifocal embolic distal left MCA infarcts<br><br>In-stent thrombus/platelet aggregation in cervical ICA | 12              | 5          |
| 7       | 10             | Yes, Large Vessel (M1 + A2)   | No/Yes, IA tPA                 | 2b               | Cavernous Segment              | 9                      | 4                                           | Neuroform<br>4.5 × 30 mm<br>4.5 × 30 mm<br>4.5 × 20 mm<br>4.5 × 15 mm<br>Precise RX<br>5 × 40 mm<br>6 × 40 mm<br>SE (n = 6)      | Hemorrhagic conversion in temporal lobe                                                                   | 9               | 4          |
| 8       | 31             | Yes, Large Vessel (M1 and M2) | No/Yes, IA tPA Stent Retriever | 2b               | Distal Cervical Segment        | 5                      | 2b                                          | Resolute Integrity<br>4.0 × 38 mm<br>4.0 × 18 mm<br>Precise<br>5 × 20 mm<br>SE (n = 1)<br>BE (n = 2)                             | None                                                                                                      | 13              | 3          |

Continued on next page

**On-line Table: Continued**

| Patient | Baseline NIHSS | Intracranial Occlusion    | IV tPA/IA tPA or Thrombectomy | TICI Reperfusion | Anatomic Extent ICA Dissection | Dissection Length (cm) | Flow Limitation Classification <sup>a</sup> | Types/No. of Stents                                                                                                 | Complications | Discharge NIHSS | 90-Day mRS |
|---------|----------------|---------------------------|-------------------------------|------------------|--------------------------------|------------------------|---------------------------------------------|---------------------------------------------------------------------------------------------------------------------|---------------|-----------------|------------|
| 9       | 22             | Yes, Large Vessel (M1)    | No/Yes, Stent Retriever       | 2b               | Distal Cervical Segment        | 6.5                    | 2b                                          | Wingspan 4.5 × 20 mm<br>Xact<br>8–6 × 40 mm<br>Precise<br>6 × 40 mm<br>SE (n = 3)                                   | None          | 6               | 1          |
| 10      | 20             | Yes, Small Vessel         | No/No                         | 3                | Cavernous Segment              | 9                      | 3b                                          | Precise<br>6 × 40 mm<br>7 × 30 mm<br>7 × 40 mm<br>SE (n = 3)                                                        | None          | 1               | 1          |
| 11      | 19             | Yes, Small Vessel (M3–M4) | Yes/No                        | 2b               | Petrous Segment                | 9                      | 4                                           | Neuroform<br>4 × 20 mm<br>4.5 × 20 mm<br>Wingspan<br>4.5 × 20 mm<br>Precise<br>6 × 40 mm<br>7 × 40 mm<br>SE (n = 5) | None          | 3               | 0          |
| 12      | 11             | No                        | Yes/No                        | 3                | Cavernous Segment              | 3.5                    | 3b                                          | Wingspan<br>4.5 × 20 mm<br>Neuroform<br>4.5 × 20 mm<br>4.5 × 20 mm<br>SE (n = 3)                                    | None          | 10              | 4          |
| 13      | 20             | Yes, Large Vessel (M1)    | Yes/Yes, Thromboaspiration    | 3                | Petrous Segment                | 9                      | 3b                                          | Wingspan<br>4.5 × 9 mm<br>4.5 × 20 mm<br>Precise Pro Rx<br>5 × 20 mm<br>6 × 40 mm<br>8 × 30 mm<br>SE (n = 5)        | None          | 0               | 0          |

Continued on next page

**On-line Table: Continued**

| Patient | Baseline NIHSS | Intracranial Occlusion | IV tPA/IA tPA or Thrombectomy | TICI Reperfusion | Anatomic Extent ICA Dissection | Dissection Length (cm) | Flow Limitation Classification <sup>a</sup> | Types/No. of Stents                                                                                    | Complications | Discharge NIHSS | 90-Day mRS |
|---------|----------------|------------------------|-------------------------------|------------------|--------------------------------|------------------------|---------------------------------------------|--------------------------------------------------------------------------------------------------------|---------------|-----------------|------------|
| 14      | 4              | Yes, Small Vessel      | No/No                         | 2b               | Petrous Segment                | 6                      | 4                                           | Wingspan<br>4.5 × 20 mm<br>4.5 × 20 mm<br>Precise Pro Rx<br>6 × 30 mm<br>7 × 20 mm<br>SE (n = 4)       | None          | 1               | 0          |
| 15      | 15             | No                     | No/No                         | 3                | Petrous Segment                | 7.5                    | 3b                                          | Wingspan<br>4.5 × 20 mm<br>4.5 × 20 mm<br>Precise<br>6 × 30 mm<br>7 × 40 mm<br>7 × 20 mm<br>SE (n = 5) | None          | 5               | 0          |

**Note:**—BE indicates balloon-expanding; SE, self-expanding.

<sup>a</sup> Modified Carotid Artery Injury Grading Scale; grade 1: subintimal dissection <25% stenosis; grade 2a: subintimal dissection >25% stenosis; grade 2b: >70% and/or flow limiting; grade 3a: pseudoaneurysm; grade 3b: with >70% stenosis and/or flow limitation; grade 4: complete vessel occlusion; grade 5: complete transection or AVF.
